# Supplementary material for: Distinct thermoresponsive behaviour of oligo- and poly-ethylene glycol protected gold nanoparticles in concentrated salt solutions
Source: Royal Society of Chemistry journal article supplement (doi:10.1039/d1na00392e), 2021-01-01
Supplement: d1na00392e1.pdf [file d1na00392e1.pdf]

Supporting information

**Distinct thermoresponsive behaviour of oligo- and poly-ethylene glycol  
protected gold nanoparticles in concentrated salt solutions.**

Miriam Chávez, Ángela Fernández-Merino, Guadalupe Sánchez-Obrero, Rafael  
Madueño, José Manuel Sevilla, Manuel Blázquez, Teresa Pineda\*

Department of Physical Chemistry and Applied Thermodynamics, Institute of Fine  
Chemistry and Nanochemistry, University of Cordoba, Campus Rabanales, Ed. Marie  
Curie 2<sup>a</sup> Planta, E-14014 Córdoba, Spain

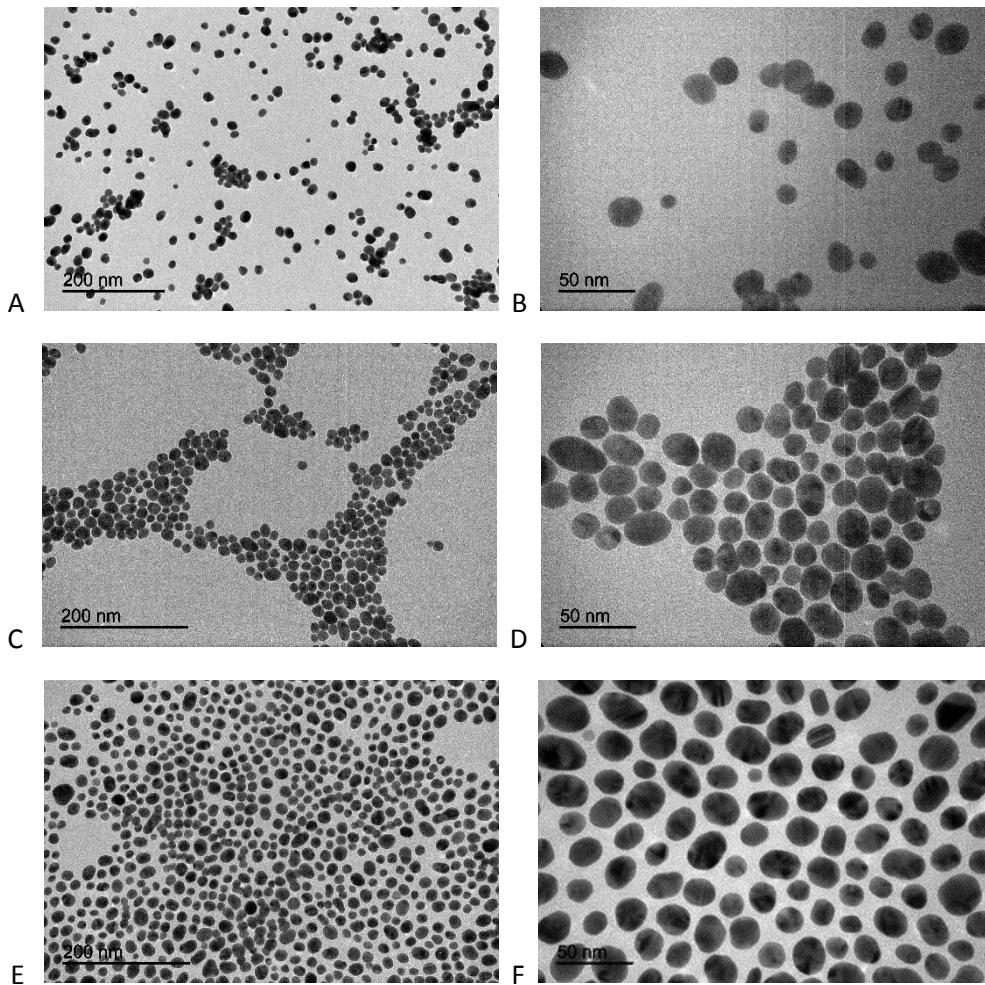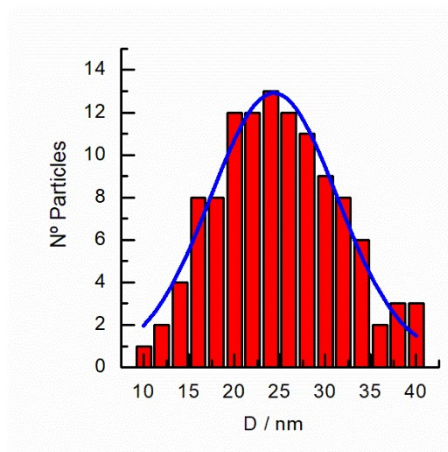

Figure S1. TEM images of AuNPs: (A, B): c-AuNPs; (C,D) EG18-AuNPs; (E, F) EG136-AuNPs. Size distribution of the AuNPs.

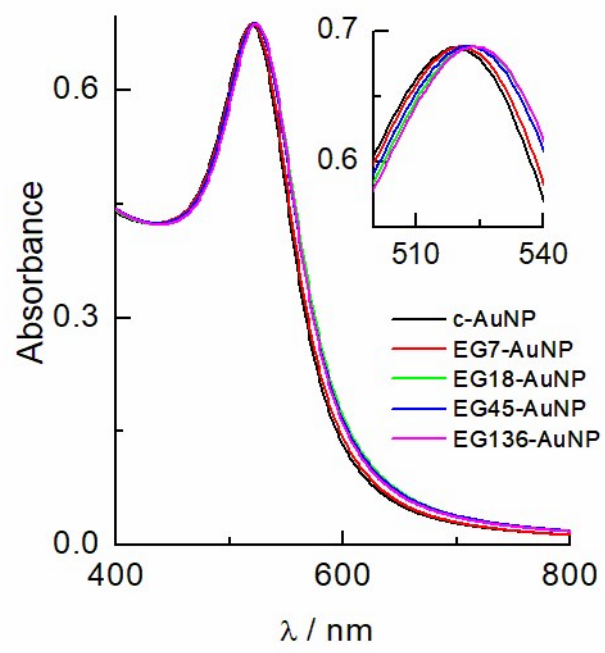

Figure S2. UV-visible spectra of AuNPs modified with EGN of different chain length.

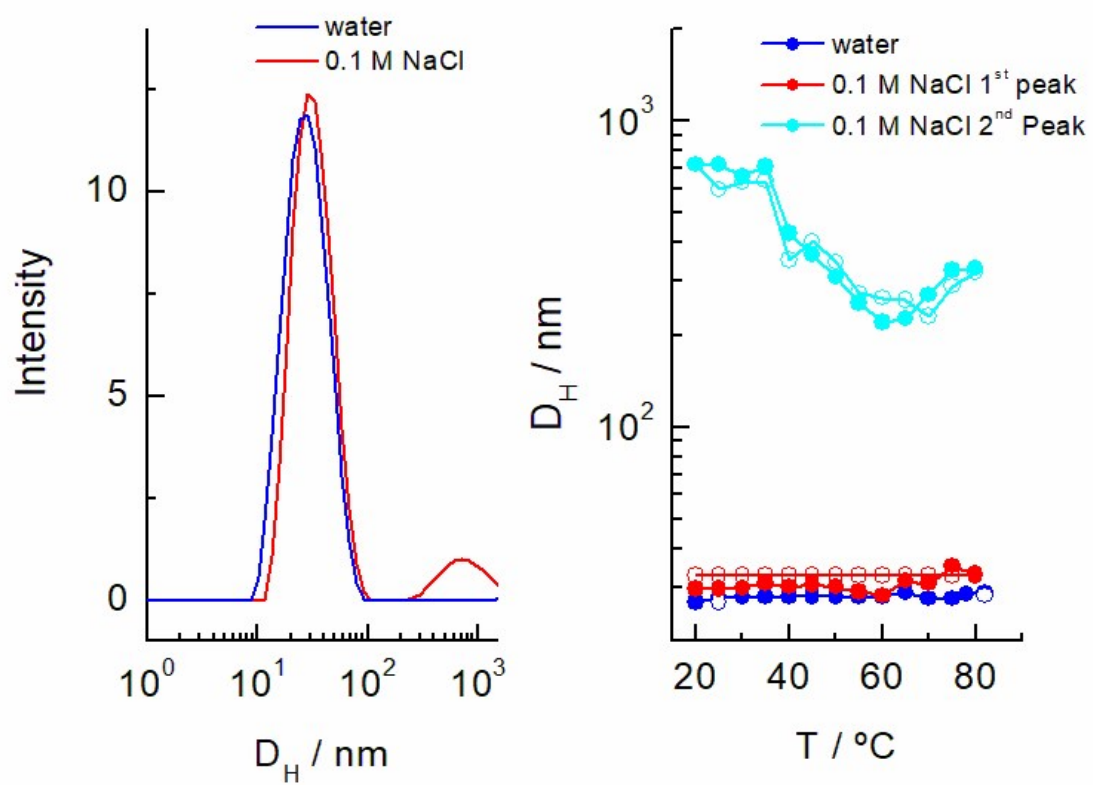

Figure S3. (A) Size distribution of EG7-AuNPs; (B) Hydrodynamic diameters of EG7-AuNPs as a function of temperature under different conditions.
